# Supplementary material for: Situational analysis and reflections on the introduction of advanced practice nurses in Brazilian primary healthcare
Source: Springer Nature journal article supplement (doi:10.1186/s12960-021-00632-w), 2021-07-22
Supplement: MOESM1 [file 19383874]

## ADDITIONAL FILE I – SCOPING REVIEW

### **Aim**

To identify and map the literature on the practices developed by nurses in the context of Primary Health Care (PHC) in Brazil.

### **Study design**

A scoping review of the national literature on the topic in perspective was carried out, namely: the practices developed by nurses in the context of PHC in Brazil. Scoping review was chosen, instead of other types of knowledge synthesis, because it follows a systematic approach to map the evidence and be considered exploratory and appropriate when the purpose is to examine the extent and nature of the productions, clarify concepts, identify potentialities, and systematize findings on a given topic that is still little explored<sup>1</sup>.

### **Research protocol**

The research was guided by *Preferred Reporting Items for Systematic reviews and Meta-Analyses extension for Scoping Reviews* (PRISMA-ScR)<sup>1</sup>, a guideline that describes a minimum set of items to be considered in the development of scope review reports, ensuring its methodological transparency. Regarding the method, the PRISMA-ScR guides the achievement of the stages of the review, which includes: the outline of the guiding question; definition of the eligibility criteria; selection of information sources; definition of search strategies and selection process; analysis; and synthesis of the results.

### **Guiding question**

The PCC approach<sup>2</sup> (P = population; C = concept; C = context) was followed to formulate the research question: What are the practices performed by nurses in the context of PHC in Brazil? In this case, nurses, practices and PHC in Brazil were considered population, concept, and context, respectively.

### **Eligibility criteria**

#### *Scope and types of evidence sources*

All primary studies focused on the topic, published in Portuguese, English or Spanish, were included in the sample. No time limits and methodological approaches were adopted. Abstracts, editorials, reviews, letters, interviews, videos, and redundant publications were excluded.

#### *Population, concept, and context*

Considering the PCC mnemonic, publications that included nurses working in Brazilian PHC, of any gender, age, or working time were included. Additionally, for inclusion, studies needed to report at least one practice (action, activity, intervention) performed by nurses in their daily work.

### **Information sources and search strategies**

To define search strategies, a limited mapping was initially carried out in the Virtual Health Library (VHL), based on the strategy “nursing AND primary care AND Brazil”. This initial search was followed by an analysis of the words of the text contained in the title and keywords of the articles retrieved and published in the last two years. From this step, it was possible to select a set of descriptors corresponding to the thesauri adopted by the VHL and Medical Literature Analysis and Retrieval System Online (MEDLINE), and non-indexed terms (Table 1). These were combined by the Boolean operators AND, OR and NOT, constituting different search strategies according to the researched database (Table 2).

Subsequently, the systematized searches were carried out in March 2021, in the databases of Latin American and Caribbean Literature in Health Sciences (LILACS); Scientific Electronic Library Online (SciELO); MEDLINE via PUBMED; and Cumulative Index to Nursing and Allied Health Literature (CINAHL).

---

<sup>1</sup> Tricco AC, Lillie E, Zarin W, O’Brien KK, Colquhoun H, Levac D. et al. PRISMA Extension for Scoping Reviews (PRISMA-ScR): Checklist and Explanation. *Ann Intern Med.* 2018;169(7):467-73. <https://doi.org/10.7326/M18-0850>

<sup>2</sup> Joanna Briggs Institute. The Joanna Briggs Institute reviewers' manual 2015: methodology for JBI scoping reviews. Adelaide: Joanna Briggs Institute; 2015

**Table S1.** Terms selected for research

| Language   | Search terms                                                                                                                                                                                                                                            |                                                                                                                                              |                                                                                               |
|------------|---------------------------------------------------------------------------------------------------------------------------------------------------------------------------------------------------------------------------------------------------------|----------------------------------------------------------------------------------------------------------------------------------------------|-----------------------------------------------------------------------------------------------|
|            | Population                                                                                                                                                                                                                                              | Concept                                                                                                                                      | Context                                                                                       |
| English    | nurses OR nursing OR nurse midwives OR primary care nursing OR primary nursing OR family nurse practitioners OR community health nursing OR public health nursing OR family nursing                                                                     | advanced practice nursing OR nurse's role OR professional practice OR professional role OR nursing care OR scope of practice                 | primary health care OR family health strategy OR family health<br><br>AND brazil              |
| Portuguese | enfermeiras e enfermeiros OR enfermagem OR enfermeiras obstétricas OR enfermagem de atenção primária OR enfermagem primária OR enfermeiras de saúde da família OR enfermagem em saúde comunitária OR enfermagem em saúde pública OR enfermagem familiar | prática avançada de enfermagem OR papel do profissional de enfermagem OR prática profissional OR cuidados de enfermagem OR âmbito da prática | atenção primária à saúde OR estratégia saúde da família OR saúde da família<br><br>AND brasil |

**Table S2.** Search strategies

| Source  | Search strategies                                                                                                                                                                                                                                                                                                                                                                                                                                                                                                                             |
|---------|-----------------------------------------------------------------------------------------------------------------------------------------------------------------------------------------------------------------------------------------------------------------------------------------------------------------------------------------------------------------------------------------------------------------------------------------------------------------------------------------------------------------------------------------------|
| Lilacs  | enfermeiras e enfermeiros OR enfermagem OR enfermeiras obstétricas OR enfermagem de atenção primária OR enfermagem primária OR enfermeiras de saúde da família OR enfermagem em saúde comunitária OR enfermagem em saúde pública OR enfermagem familiar [Palavras] AND prática avançada de enfermagem OR papel do profissional de enfermagem OR prática profissional OR cuidados de enfermagem OR âmbito da prática [Palavras] AND (atenção primária à saúde OR estratégia saúde da família OR saúde da família) AND brasil [Palavras]        |
| SciELO  | ((enfermeiras e enfermeiros) OR (enfermagem) OR (enfermeiras obstétricas) OR (enfermagem de atenção primária) OR (enfermagem primária) OR (enfermeiras de saúde da família) OR (enfermagem em saúde comunitária) OR (enfermagem em saúde pública) OR (enfermagem familiar)) AND ((prática avançada de enfermagem) OR (papel do profissional de enfermagem) OR (prática profissional) OR (cuidados de enfermagem) OR (âmbito da prática)) AND ((atenção primária à saúde) OR (estratégia saúde da família) OR (saúde da família)) AND (brasil) |
| Medline | ((nurses OR nursing OR nurse midwives OR primary care nursing OR primary nursing OR family nurse practitioners OR community health nursing OR public health nursing OR family nursing[MeSH Terms]) AND (advanced practice nursing OR nurse's role OR professional practice OR professional role OR nursing care OR scope of practice[MeSH Terms])) AND (primary health care OR family health strategy OR family health[MeSH Terms]) AND (brazil[Title/Abstract]) Filters: Journal Article, Humans, English, Portuguese, Spanish               |
| Cinahl  | TI ( nurses OR nursing OR nurse midwives OR primary care nursing OR primary nursing OR family nurse practitioners OR community health nursing OR public health nursing OR family nursing ) AND ( advanced practice nursing OR nurse's role OR professional practice OR professional role OR nursing care OR scope of practice ) AND ( primary health care OR family health strategy OR family health ) AND brazil                                                                                                                             |

A third step consisted of verifying the reference list of the selected studies (cross-reference), in order to identify material of interest for this study - not recovered in the previous phase - which were accessed by the electronic databases.

### Selection, analysis, and results synthesis process

The selection of publications was carried out in three stages: screening, in which duplicate studies were excluded; eligibility, stage in which the titles, abstracts and keywords of the records were read by two independent reviewers, applying previously defined criteria; and consensus, when the remaining publications were recovered and submitted to full reading guided by a script, by the two reviewers who, together, determined the inclusion or exclusion of the selected material (Figure 1).

The analytical reading of the studies sought to identify the set of practices performed by nurses in the context of PHC. The data were compiled in Excel spreadsheets and text files and subjected to the usual techniques of descriptive analysis and content analysis. In the end, a synthesis of knowledge was produced from thematic categories.

**Figure S1.** Flowchart of the refinement process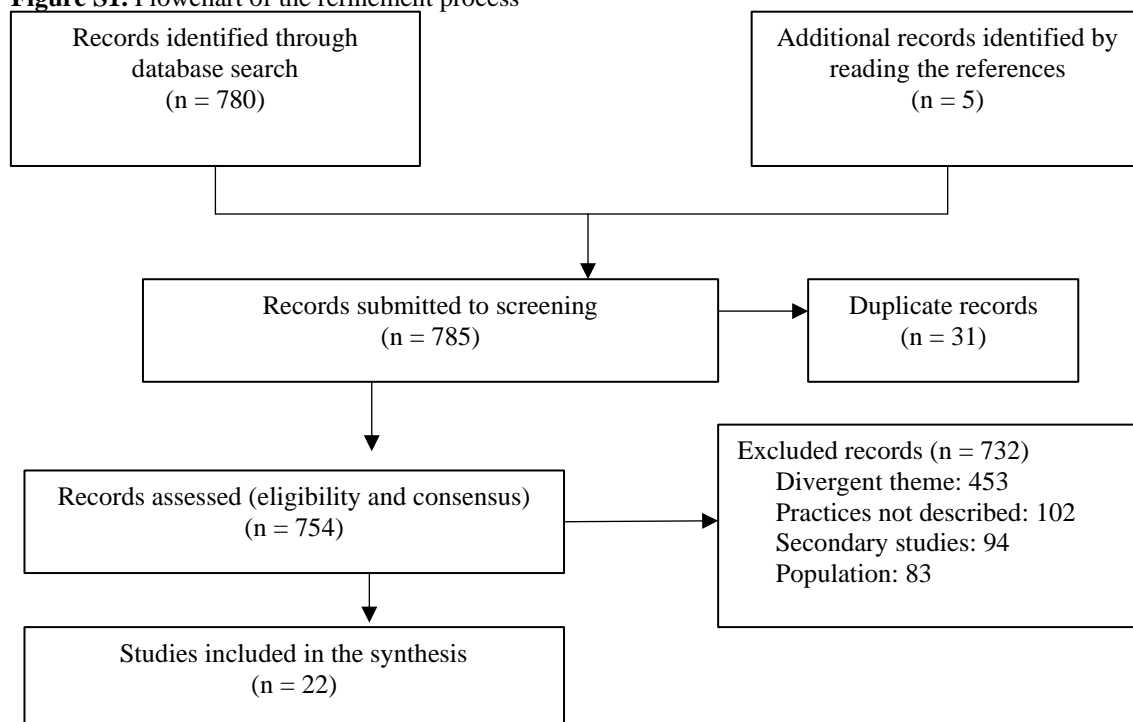

## Characteristics of publications

**Table S3.** Characterization variables the set of publications

| Characterization variables      | N  | %    |
|---------------------------------|----|------|
| <b>Year</b>                     |    |      |
| 2009                            | 1  | 4.5  |
| 2011                            | 1  | 4.5  |
| 2013                            | 2  | 9.1  |
| 2014                            | 1  | 4.5  |
| 2015                            | 3  | 13.6 |
| 2016                            | 1  | 4.5  |
| 2017                            | 5  | 22.7 |
| 2018                            | 4  | 18.2 |
| 2019                            | 3  | 13.6 |
| 2021                            | 1  | 4.5  |
| <b>Language</b>                 |    |      |
| More than one language          | 13 | 59.1 |
| Portuguese                      | 8  | 36.4 |
| English                         | 1  | 4.5  |
| <b>Type of publication</b>      |    |      |
| Journal article                 | 18 | 81.8 |
| Thesis                          | 2  | 9.1  |
| Dissertation                    | 1  | 4.5  |
| Research Report                 | 1  | 4.5  |
| <b>Methodological Approach</b>  |    |      |
| Qualitative                     | 14 | 63.6 |
| Quantitative                    | 8  | 36.4 |
| <b>Data collection method</b>   |    |      |
| Interviews                      | 8  | 36.4 |
| Interviews and observation      | 4  | 18.2 |
| Observation                     | 4  | 18.2 |
| Self-administered questionnaire | 3  | 13.6 |
| Online survey                   | 2  | 9.1  |
| Focus group                     | 1  | 4.5  |

**Table S4.** Indexing data, aims, and methods of the set of publications.

| Year | Type       | Language               | Authors                     | Title                                                                                                                                                                                 | Aim                                                                                                                                                                                                                                                                                                                               | Sample of nurses | Methods                                        | Data collect                    |
|------|------------|------------------------|-----------------------------|---------------------------------------------------------------------------------------------------------------------------------------------------------------------------------------|-----------------------------------------------------------------------------------------------------------------------------------------------------------------------------------------------------------------------------------------------------------------------------------------------------------------------------------|------------------|------------------------------------------------|---------------------------------|
| 2021 | Article    | Portuguese             | Mendes M et al.             | Práticas da enfermagem na estratégia saúde da família no Brasil: interfaces no adoecimento                                                                                            | To identify Nursing practices in the Family Health Strategy in Brazil and interfaces in the illness of these professionals.                                                                                                                                                                                                       | 45               | qualitative and exploratory                    | interviews and observation      |
| 2016 | Article    | Portuguese and English | Bonfim D et al.             | Time standards of nursing in Primary Health Care: an observational study                                                                                                              | To determine time standards for interventions and activities conducted by nursing professionals in Family Health Units in Brazil to substantiate the calculation of work force                                                                                                                                                    | 47               | observational and quantitative                 | observation                     |
| 2017 | Thesis     | Portuguese             | Lemos PFS                   | As ações de saúde realizadas por enfermeiros e o uso de protocolos clínicos e diretrizes terapêuticas no contexto atual da Estratégia Saúde da Família no município do Rio de Janeiro | To analyze the health actions performed by nurses and the use of clinical protocols and therapeutic guidelines in the current context of the Family Health Strategy in the city of Rio de Janeiro                                                                                                                                 | 219              | cross-sectional, quantitative, and descriptive | online survey                   |
| 2018 | Article    | Portuguese and English | Corrêa VAF et al.           | The care of nurses in the Family Health Strategy: practices and theoretical foundation                                                                                                | To analyze the practices of nurses working in the Family Health Strategy in a city of Rio de Janeiro (RJ) and the theoretical foundations that guide them.                                                                                                                                                                        | 12               | qualitative and descriptive                    | interviews                      |
| 2019 | Thesis     | Portuguese             | Koster I                    | O exercício profissional da enfermagem no âmbito da Atenção Primária à Saúde no Brasil                                                                                                | To analyze the professional practice of nurses in the context of Primary Health Care in Brazil, considering the context of changes and extensions of their care practices, in the light of the Sociology of Professions theory, with a view to understanding what elements may provoke changes in the archetype of the profession | 10               | qualitative and descriptive                    | focus group                     |
| 2018 | Article    | Portuguese and English | Forte ECN et al.            | Does the nurses' work change when the Primary Health Care change?                                                                                                                     | To identify the activities developed by nurses in Basic Health Units, including units that are still under the care model guided by biomedicine as well as units that use the Family Health Strategy model                                                                                                                        | 20               | qualitative and exploratory                    | interviews and observation      |
| 2014 | Article    | Portuguese and English | Paula M et al.              | Characteristics of the nurses' work process in the family health strategy                                                                                                             | To characterize the work activities undertaken by nurses who work in the Family Health Strategy in a health unit in a city in southern Brazil                                                                                                                                                                                     | 4                | qualitative and descriptive                    | observation                     |
| 2017 | Dissertat. | Portuguese             | Amoras JAB                  | Ações de saúde da mulher desenvolvidas pela equipe de enfermagem da Estratégia Saúde da Família no Mato Grosso do Sul                                                                 | To analyze the actions of women's health developed by the nursing team of the Family Health Strategy in Campo Grande, Mato Grosso do Sul, according to National Primary Health Care Policy                                                                                                                                        | 62               | cross-sectional, quantitative, and descriptive | self-administered questionnaire |
| 2015 | Article    | Portuguese and English | Tavares RE and Tocantins FR | Nursing actions in primary care and the control of diseases preventable through vaccines                                                                                              | To discuss the actions performed by nurses in the control and eradication of diseases preventable with vaccines in healthcare setting, according to the National Primary Health Care Policy                                                                                                                                       | 10               | phenomenological and qualitative               | interviews                      |
| 2017 | Article    | Portuguese and English | Ferraccioli P and Acioli S  | The different dimensions of care in practice held by nurses in primary care                                                                                                           | To understand the practices developed in the care provided by nurses in the National Health Programs in a unit of the basic health network in the city of Rio de Janeiro.                                                                                                                                                         | 8                | exploratory and qualitative case study         | interviews and observation      |
| 2015 | Article    | Portuguese and English | Acioli S et al.             | Care practices: the role of nurses in primary health care                                                                                                                             | To know the care practices developed by nurses in primary health care in the city of Rio de Janeiro                                                                                                                                                                                                                               | 30               | descriptive and qualitative                    | interviews                      |
| 2013 | Article    | Portuguese             | Duarte HSJ and Mamede MV    | Ações do pré-natal realizadas pela equipe de enfermagem na Atenção Primária à Saúde, Cuiabá                                                                                           | To describe the actions taken by the nursing staff in prenatal city of Cuiabá, MT                                                                                                                                                                                                                                                 | 74               | descriptive and quantitative                   | observation                     |

|      |                 |                                  |                                       |                                                                                                      |                                                                                                                                                                |       |                                                  |                                                 |
|------|-----------------|----------------------------------|---------------------------------------|------------------------------------------------------------------------------------------------------|----------------------------------------------------------------------------------------------------------------------------------------------------------------|-------|--------------------------------------------------|-------------------------------------------------|
| 2018 | Article         | Portuguese and English           | Becker RM et al.                      | Nursing care practices for people with chronic noncommunicable diseases                              | To understand care practices for people with Chronic Noncommunicable Disease, developed by Primary Health Care nurses in a municipality in southern Brazil     | 23    | qualitative; Discourse of the Collective Subject | interviews                                      |
| 2018 | Article         | Portuguese and English           | Vieira DS et al.                      | Nursing practices in childcare consultation in the Estratégia Saúde da Família                       | To analyze the care actions performed by nurses during childcare consultations                                                                                 | 31    | observational and quantitative                   | observation                                     |
| 2017 | Article         | Portuguese and English           | Girardi SN et al.                     | Scope of practice in Primary Care: physicians and nurses in five health regions in Brazil            | To investigate the scope of practice of physicians and nurses who work in the Primary Healthcare and their main barriers                                       | 26    | exploratory and qualitative                      | interviews                                      |
| 2017 | Research Report | Portuguese                       | Pierantoni CR and Girardi SN (Coord.) | Regulação do Trabalho e das Profissões em Saúde                                                      | Identify the attributions, competencies and scope of practices different health professions and occupations within the scope of Primary Health Care            | 2.707 | cross-sectional, quantitative, and descriptive   | online survey                                   |
| 2011 | Article         | English                          | Narchi NZ                             | Exercise of essential competencies for midwifery care by nurses in São Paulo, Brazil                 | To analyze the exercise of essential competencies for midwifery care by nurses and/or midwives in the public health system of São Paulo (eastern zone), Brazil | 204   | descriptive, exploratory, and qualitative        | self-administered questionnaire                 |
| 2018 | Article         | Portuguese and English           | Peduzzi M et al.                      | Expansion of the interprofessional clinical practice of Primary Care nurses                          | To analyze the clinical practice of nurses in the interprofessional context of the Family Health Strategy                                                      | 1     | exploratory and qualitative case study           | interviews and observation                      |
| 2015 | Article         | Portuguese, English, and Spanish | Baptista RS et al.                    | Prenatal care: essential actions developed by nurses                                                 | To investigate the profile, knowledge and practice of nurses who work in low-risk prenatal                                                                     | 15    | cross-sectional, quantitative, and descriptive   | interviews                                      |
| 2009 | Article         | Portuguese                       | Nunes PS et al.                       | Descrição das práticas dos Enfermeiros da atenção básica direcionadas para idosos diabéticos         | To describe the actions that nurses perform with diabetic elderly people and compare them based on the standards issued by the Ministry of Health              | 42    | cross-sectional, quantitative, and descriptive   | self-administered questionnaire and observation |
| 2013 | Article         | Portuguese                       | Pilger C et al.                       | Compreensão sobre o envelhecimento e ações desenvolvidas pelo enfermeiro na atenção primária à saúde | To understand the perceptions of nurses about the aging process as well as identify the actions performed by the nurses                                        | 10    | exploratory and qualitative                      | interviews                                      |
| 2019 | Article         | Portuguese and English           | Kahl C et al.                         | Contributions of the nurse's clinical practice to Primary Care                                       | To understand the repercussions of the nurse's clinical practice on Primary Health Care                                                                        | 18    | qualitative research; Grounded Theory            | interviews                                      |

## Nurses' practices in Primary Care

**Table S5.** Set of practices carried out by Primary Health Care nurses.

| <b>CLINICS</b>                                                                                                                                                                                                                                                                                                                                                                                        | <b>MANAGEMENT</b>                                                                                                                                                                                                                                                                                                                                                                                                                  |
|-------------------------------------------------------------------------------------------------------------------------------------------------------------------------------------------------------------------------------------------------------------------------------------------------------------------------------------------------------------------------------------------------------|------------------------------------------------------------------------------------------------------------------------------------------------------------------------------------------------------------------------------------------------------------------------------------------------------------------------------------------------------------------------------------------------------------------------------------|
| Humanized reception<br>Support for exams / procedures<br>Care for patients of spontaneous demand<br>Risk classification<br>Communicates nosological diagnosis<br>Shared consultation<br>Nursing consultation<br>Coordinate care<br>Referring users<br>Diagnostic tests interpretation<br>Handles urgencies and emergencies<br>Burns management<br>Prescriptions<br>Technical procedures<br>Home visit | Service to users with complaints<br>Contact user by phone<br>Supplies control<br>Program coordination<br>Sets consultation schedules<br>Dispensing of medicines<br>Documentation<br>Issuance of health attestation<br>Professional scale planning<br>Unit management<br>Leadership<br>Organization of the work process of technicians<br>Actions planning<br>Data recording in information systems<br>Management of medical agenda |
| <b>HEALTH SURVEILLANCE</b>                                                                                                                                                                                                                                                                                                                                                                            | Team meetings<br>Administrative routines<br>Request ambulances<br>Request for beds hospital<br>Supervision of other professionals                                                                                                                                                                                                                                                                                                  |
| Social support for users / family<br>Active search<br>Registration of families<br>Control of communicable diseases<br>Immunization / vaccination control<br>Infection control<br>Mapping and territorialization<br>Community mobilization<br>Compulsory notification<br>Prevention of diseases<br>Health promotion                                                                                    | <b>EDUCATIONAL</b>                                                                                                                                                                                                                                                                                                                                                                                                                 |
|                                                                                                                                                                                                                                                                                                                                                                                                       | Health education (users)<br>Permanent education (professionals)<br>Preceptorship (students)                                                                                                                                                                                                                                                                                                                                        |

**Table S6.** Technical procedures, prescriptions and interpretations of diagnostic tests carried out by Primary Health Care nurses within the scope of the clinical dimension.

| <b>Prescriptions</b>                                                                                                                                                                                                                                                                 | <b>Exam interpretation</b>                                                                                                                                                                                                 |
|--------------------------------------------------------------------------------------------------------------------------------------------------------------------------------------------------------------------------------------------------------------------------------------|----------------------------------------------------------------------------------------------------------------------------------------------------------------------------------------------------------------------------|
| Dressings<br>Imaging exams<br>Laboratory tests<br>Drugs<br>Renew medical prescription<br>Supplements<br>Oral rehydration therapy<br>Transcribes medical prescription<br>Vitamins                                                                                                     | Electrocardiogram<br>Imaging exams<br>Laboratory tests<br>Pap smear<br>Tuberculin test                                                                                                                                     |
| <b>Technical procedures</b>                                                                                                                                                                                                                                                          |                                                                                                                                                                                                                            |
| Apply of medication<br>Apply of vaccines<br>Apply of local anesthesia<br>Anthropometry<br>Collection of materials for examination<br>Dressings<br>Debridement<br>Abscess drainage<br>Physical exam<br>Orthopedic immobilizations<br>Nasogastric, nasogastric and urethral intubation | Nebulization<br>Normal childbirth<br>Podiatry<br>Tuberculin test<br>Pap smear<br>Performs electrocardiogram<br>Suture points withdrawal<br>Apply sutures<br>Blood glucose test<br>Neonatal heel prick<br>Check vital signs |

## Studies included in the review

Mendes M, Trindade LL, Pires DEP, Martins MMFPS, Ribeiro OMPOL, Forte ECN et al. Práticas da enfermagem na estratégia saúde da família no Brasil: interfaces no adoecimento. *Rev Gaúcha Enferm.* 2021;42(esp):e20200117. <https://doi.org/10.1590/1983-1447.2021.20200117>

Bonfim D, Fugulin FMT, Laus AM, Peduzzi M, Gaidzinski RR. Time standards of nursing in Primary Health Care: an observational study. *Rev Esc Enferm USP.* 2016;50(1):118-26. <https://doi.org/10.1590/S0080-623420160000100016>

Lemos PFS. Ações de saúde realizadas por enfermeiros e o uso de protocolos clínicos e diretrizes terapêuticas no contexto atual da Estratégia Saúde da Família no município do Rio de Janeiro [thesis]. Rio de Janeiro: Universidade do Estado do Rio de Janeiro; 2017.

Corrêa VAF, Acioli S, Tinoco TF. The care of nurses in the Family Health Strategy: practices and theoretical foundation. *Rev Bras Enferm.* 2018;71(suppl 6):2767-74. <https://doi.org/10.1590/0034-7167-2018-0383>

Koster I. O exercício profissional da enfermagem no âmbito da Atenção Primária à Saúde no Brasil [thesis]. Rio de Janeiro: Fundação Oswaldo Cruz; 2019.

Forte ECN, Pires DEP, Scherer MDA, Soratto J. Does the nurses' work change when the Primary Health Care change? *Tempus, Actas de Saúde Colet.* 2018;11(2):53-68.

Paula M, Peres AM, Bernadino E, Eduardo EA, Sade PMC, Larocca LM. Characteristics of the nurses' work process in the family health strategy. *Rev Min Enferm.* 2014;18(2):454-70. <http://www.dx.doi.org/10.5935/1415-2762.20140034>

Amoras JAB. Ações de saúde da mulher desenvolvidas pela equipe de enfermagem da Estratégia Saúde da Família no Mato Grosso do Sul [dissertation]. Campo Grande: Universidade Federal de Mato Grosso do Sul; 2017.

Tavares RE, Tocantins FR. Nursing actions in primary care and the control of diseases preventable through vaccines. *Rev Bras Enferm.* 2015;68(5):803-9. <https://doi.org/10.1590/0034-7167.2015680506i>

Ferraccioli P; Acioli S. The different dimensions of care in practice held by nurses in primary care. *Rev Fund Care Online.* 2017;9(1):28-36. <http://dx.doi.org/10.9789/2175-5361.2017.v9i1.28-36>

Acioli S, Kebian LVA, Faria MGA, Ferraccioli P, Correa VAF. Care practices: the role of nurses in primary health care. *UERJ Nursing Journal.* 2015;22(5):637-42. <https://doi.org/10.12957/reuerj.2014.12338>

Duarte HSJ, Mamede MV. Actions performed by the nursing team in prenatal care at primary health care setting, Cuiabá, Brazil. *Cienc Enferm.* 2013;19(1):117-29. <http://dx.doi.org/10.4067/S0717-95532013000100011>

Becker RM, Heidemann ITSB, Meirelles BHS, Costa MFBNA, Antonini FO, Durand MK. Nursing care practices for people with chronic noncommunicable diseases. *Rev Bras Enferm.* 2018;71(suppl 6):2643-9. <http://dx.doi.org/10.1590/0034-7167-2017-0799>

Vieira DS, Santos NCCB, Nascimento JA, Collet N, Toso BRGO, Reichert APS. Nursing practices in child care consultation in the Estratégia Saúde da Família. *Texto Contexto - Enferm.* 2018;27(4):e4890017. <https://doi.org/10.1590/0104-07072018004890017>

Girardi SN, Stralen ACSy, Lauer TV, Cella JN, Araújo JF, Pierantoni CR et al. Scope of practice in Primary Care: physicians and nurses in five health regions in Brazil. *Rev Bras Saude Mater Infant.* 2017;17(suppl 1):S171-84. <http://dx.doi.org/10.1590/1806-9304201700s100008>

Pierantoni CR, Girardi SN (Coord.). *Regulação do Trabalho e das Profissões em Saúde [Research Report]*. Rio de Janeiro: ObservaRH/IMS/UERJ, EPSM/NESCON/UFGM; 2017.

Narchi NZ. Exercise of essential competencies for midwifery care by nurses in São Paulo, Brazil. *Midwifery.* 2011;27(1):23-9. <http://dx.doi.org/10.1016/j.midw.2009.04.007>

Peduzzi M, Aguiar C, Lima AMV, Montanari PM, Leonello VM, Oliveira MR. Expansion of the interprofessional clinical practice of Primary Care nurses. *Rev Bras Enferm.* 2019;72(Suppl 1):114-21. <http://dx.doi.org/10.1590/0034-7167-2017-0759>

Baptista RS, Dutra MOM, Coura AS, Stélio SF. Prenatal care: essential actions developed by nurses. *Enferm Glob.* 2015;14(40):96-111.

Nunes PS, Marques MB, Machado ALG, Silva MJ. Descrição das práticas dos Enfermeiros da atenção básica direcionadas para idosos diabéticos. *Cogitare Enferm.* 2009;14(4):682-8.

Pilger C, Dias JF, Kanawava C, Baratieri T, Carreira L. Compreensão sobre o envelhecimento e ações desenvolvidas pelo enfermeiro na atenção primária à saúde. *Cienc Enferm.* 2013;19(1):61-73. <http://dx.doi.org/10.4067/S0717-95532013000100006>

Kahl C, Meirelles BHS, Cunha KS, Bernardo MS, Erdmann AL. Contributions of the nurse's clinical practice to Primary Care. *Rev Bras Enferm.* 2019;72(2):354-9. <http://dx.doi.org/10.1590/0034-7167-2018-0348>
